# Supplementary material
Source: Springer Nature journal article supplement (https://www.springermedizin.de/resource/supplementary/12890_2011_278_MOESM3_ESM.pdf/9504852)

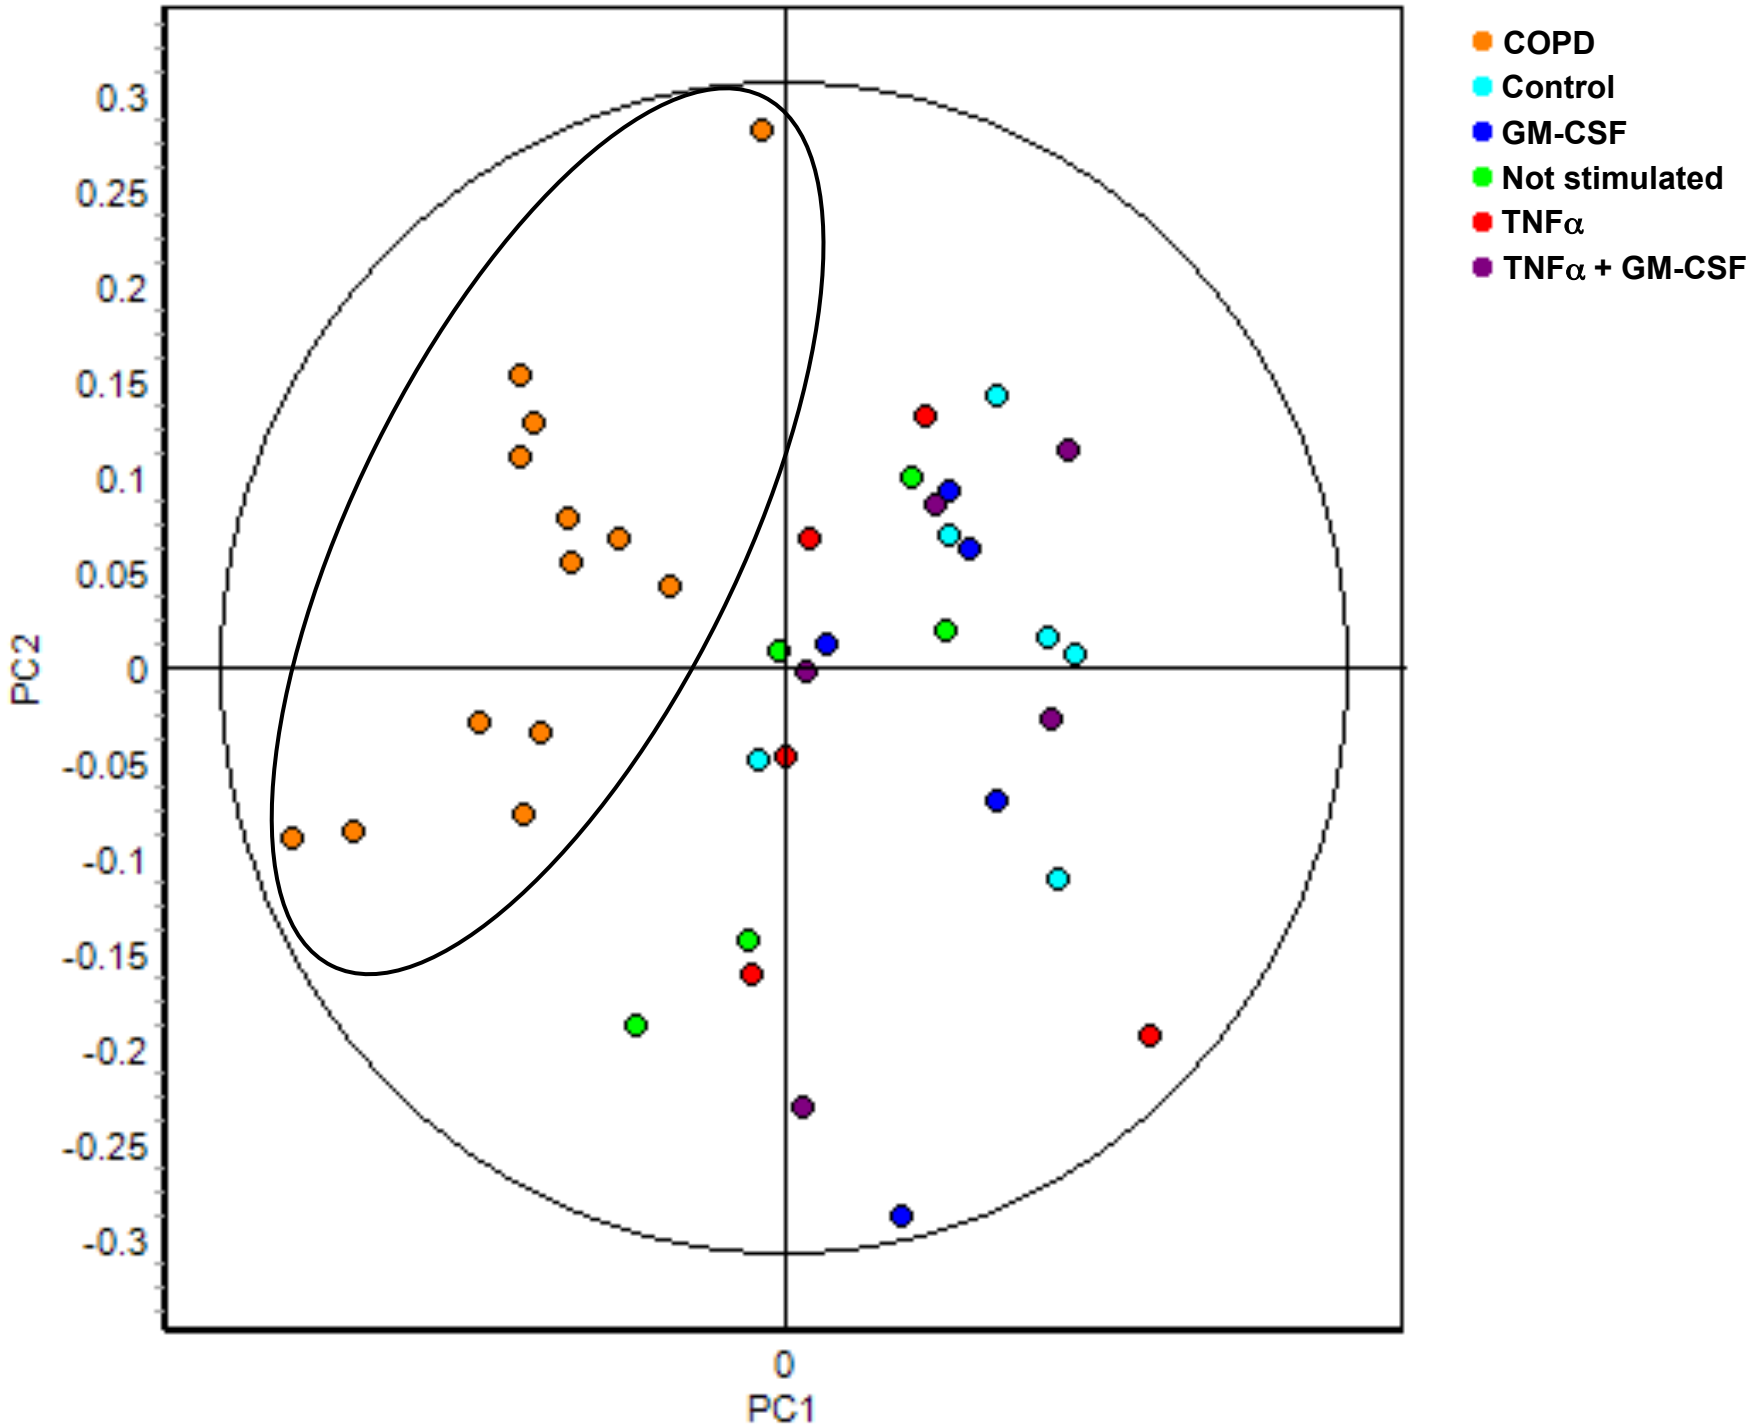

Supplement: MOESM3 [file 9504852]
